# Supplementary material for: Involvement of Mechanistic Target of Rapamycin (mTOR) in Valine Orexigenic Effects in Rainbow Trout
Source: Hindawi journal article supplement (doi:10.1155/2022/7509382), 2022-09-27

## Supplementary Figure 1. Original gels used in Western blots

Two gels were used per protein in each tissue. Each of them contained 3 samples from each group: control (C), rapamycin (R), valine (V) and rapamycin+Valine (RV). The sum of the two gels result in 6 samples per group as described in Materials and Methods

### Bsx Hypothalamus (36 kDa)

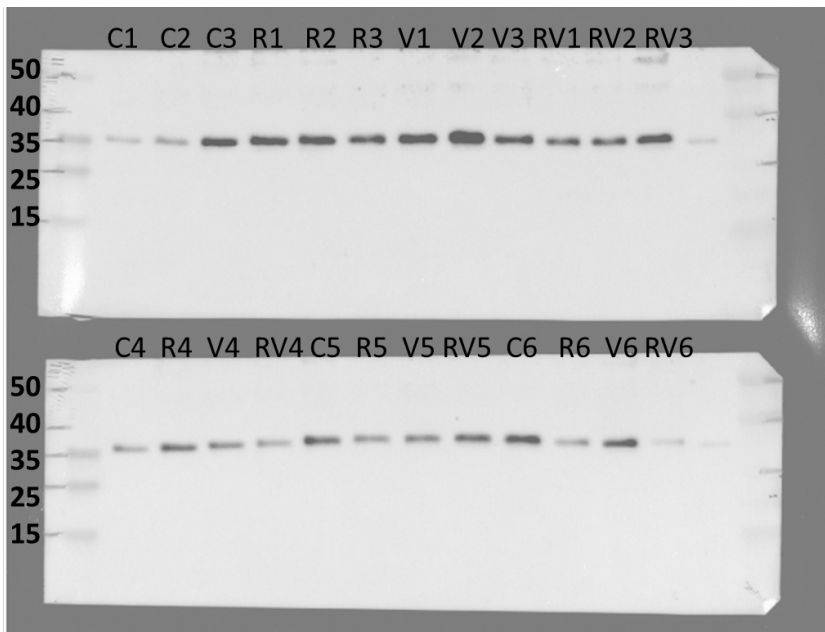

### Bsx Telencephalon (36 kDa)

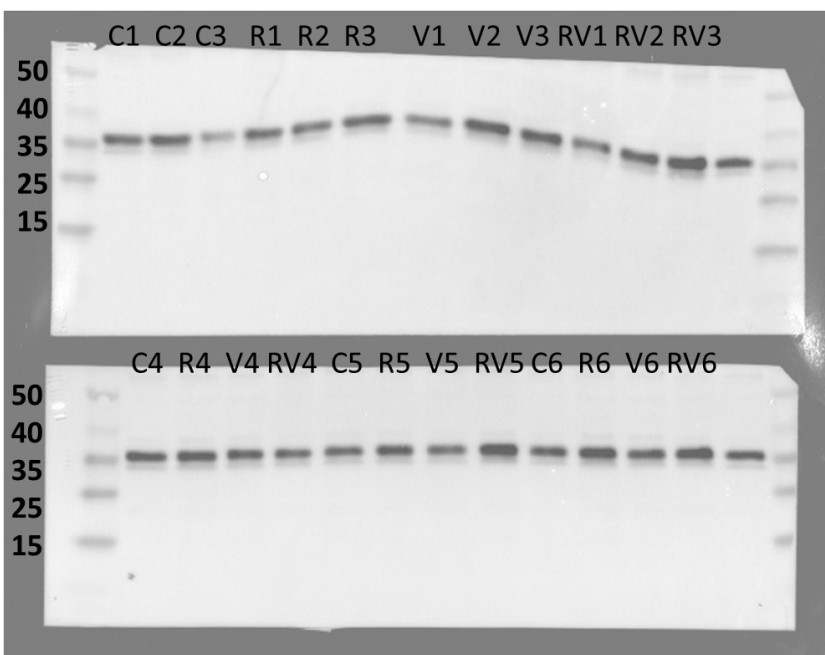

**p-Creb Hypothalamus (43 kDa)**

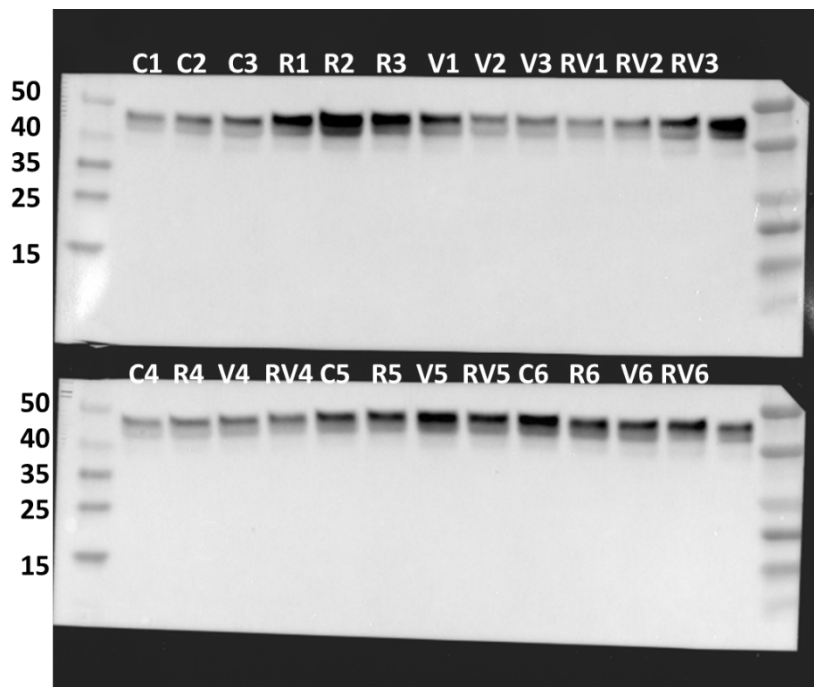

**Creb Hypothalamus (43 kDa)**

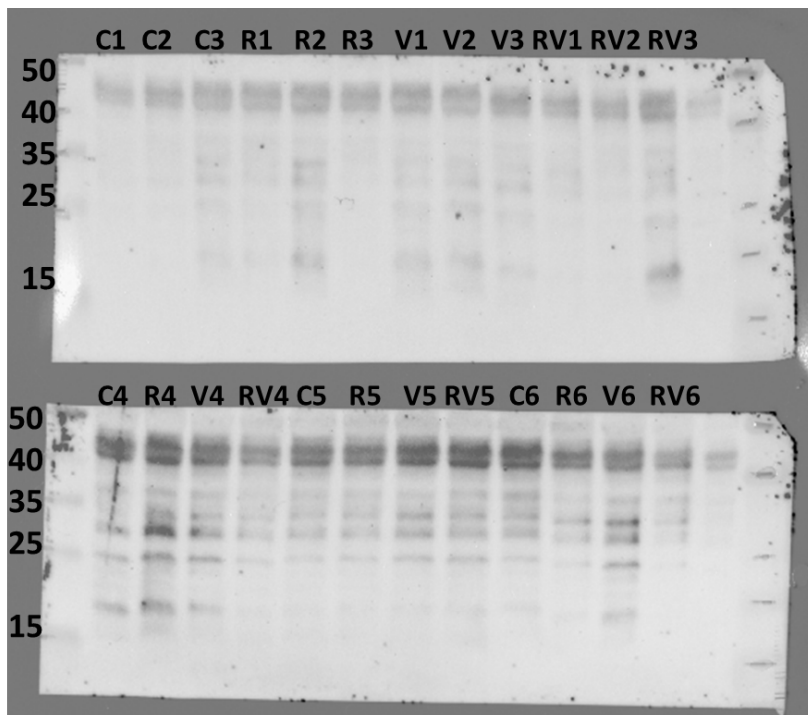

**p-Creb Telencephalon (43 kDa)**

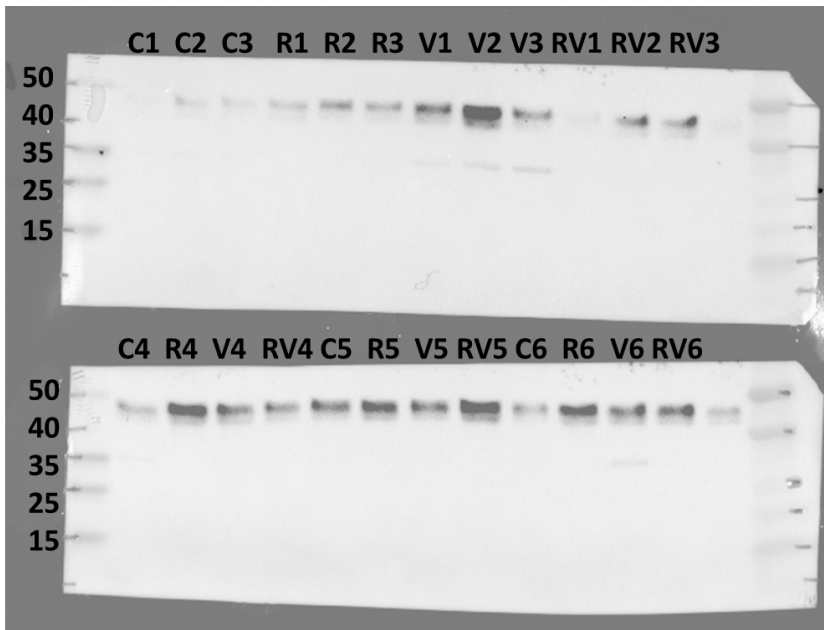

**Creb Telencephalon (43 kDa)**

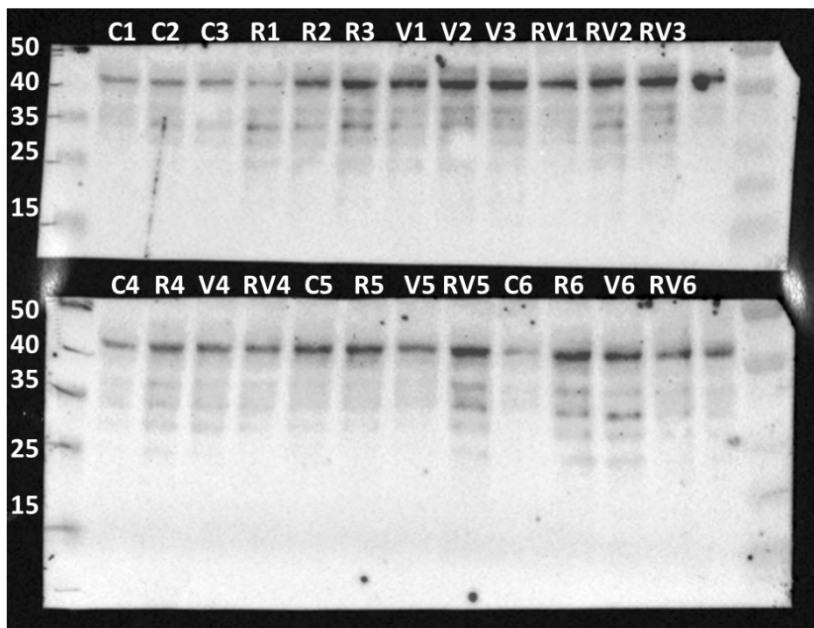

**p-Foxo1 Hypothalamus (78-82 kDa)**

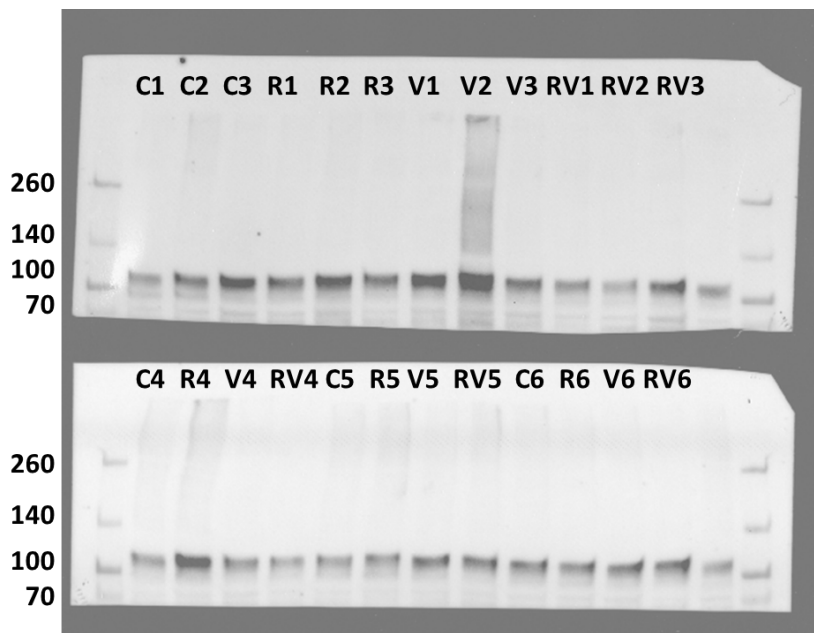

**Foxo1 Hypothalamus (78-82 kDa)**

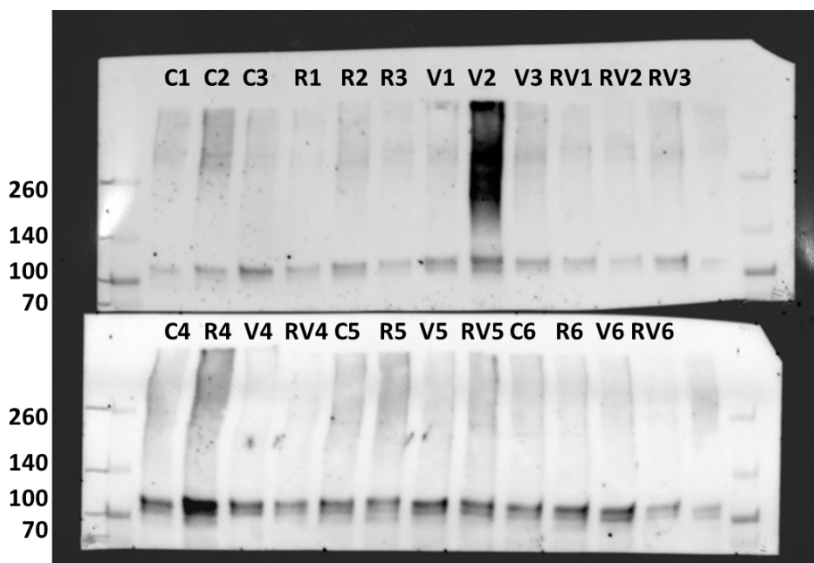

**p-Foxo1 Telencephalon (78-82 kDa)**

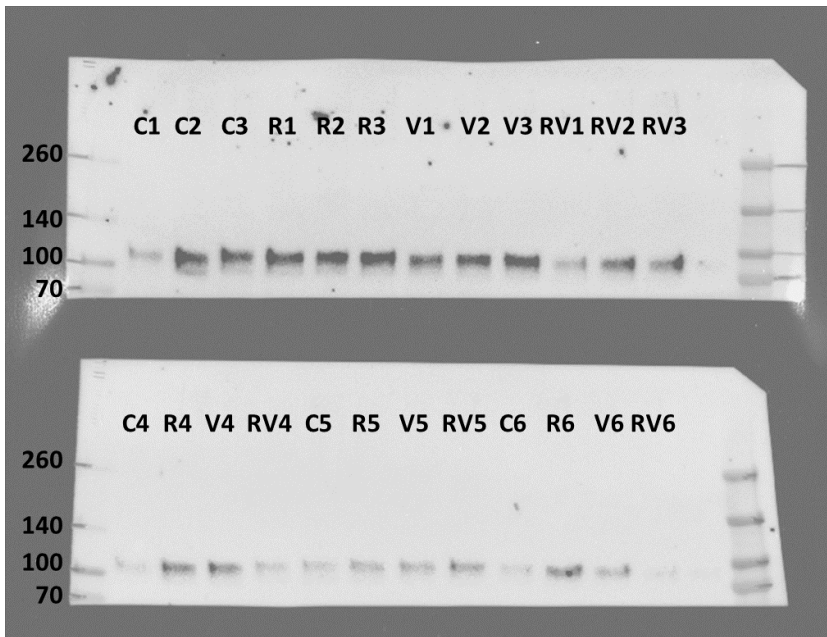

**Foxo1 Telencephalon (78-82 kDa)**

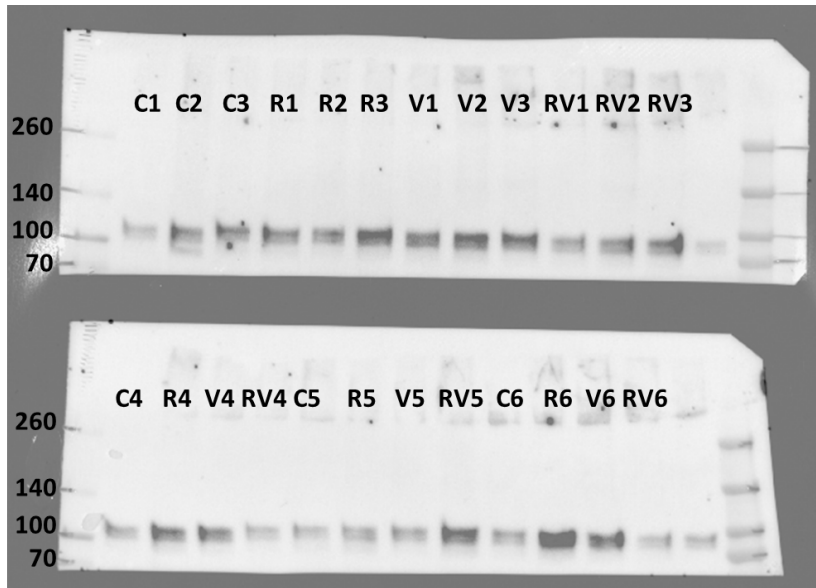

**p-mTor Hypothalamus (290 kDa)**

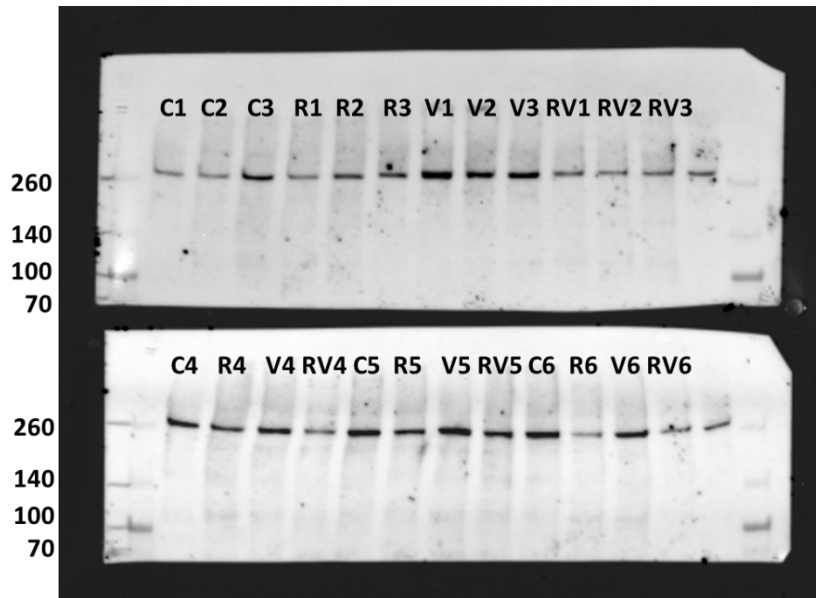

**mTor Hypothalamus (290 kDa)**

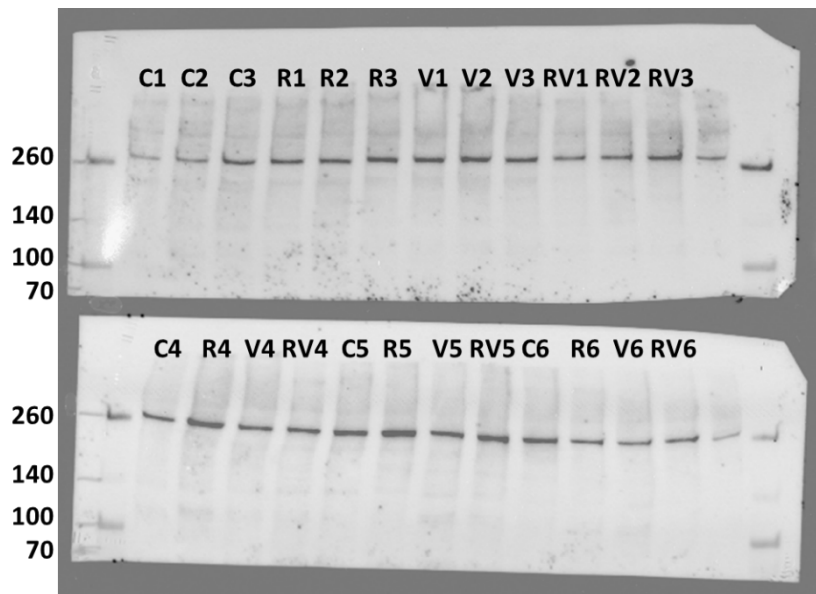

**p-mTor Telencephalon (290 kDa)**

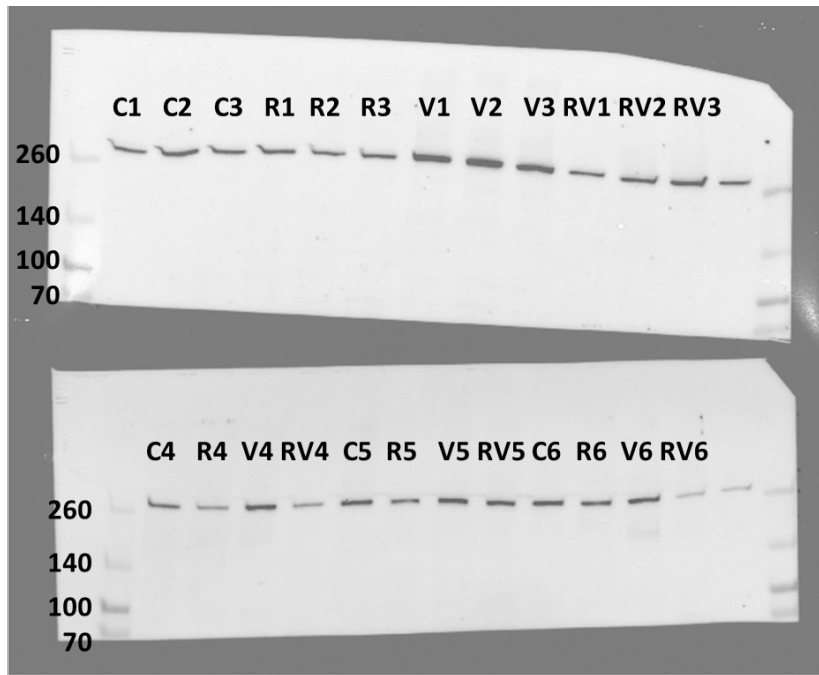

**mTor Telencephalon (290 kDa)**

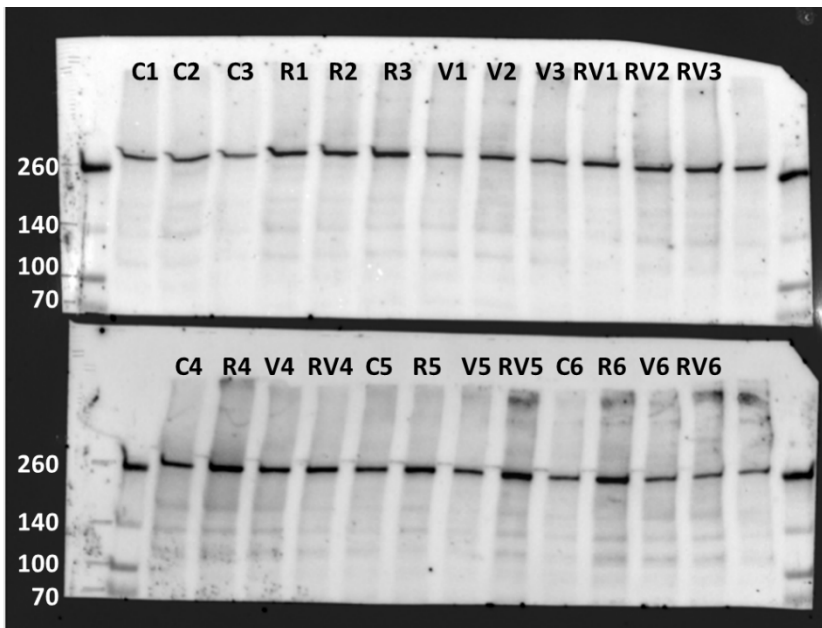

### p-S6 Hypothalamus (32 kDa)

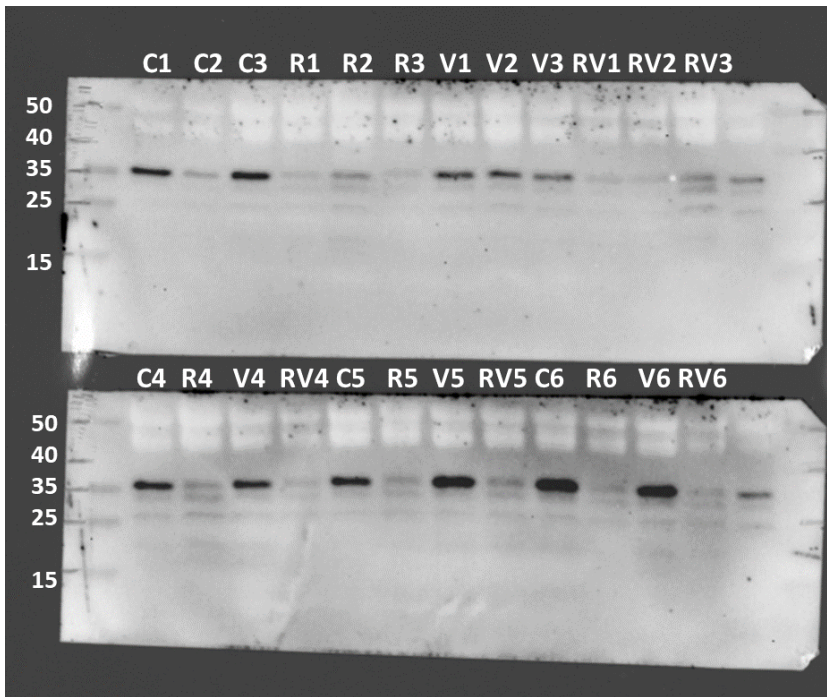

### S6 Hypothalamus (32 kDa)

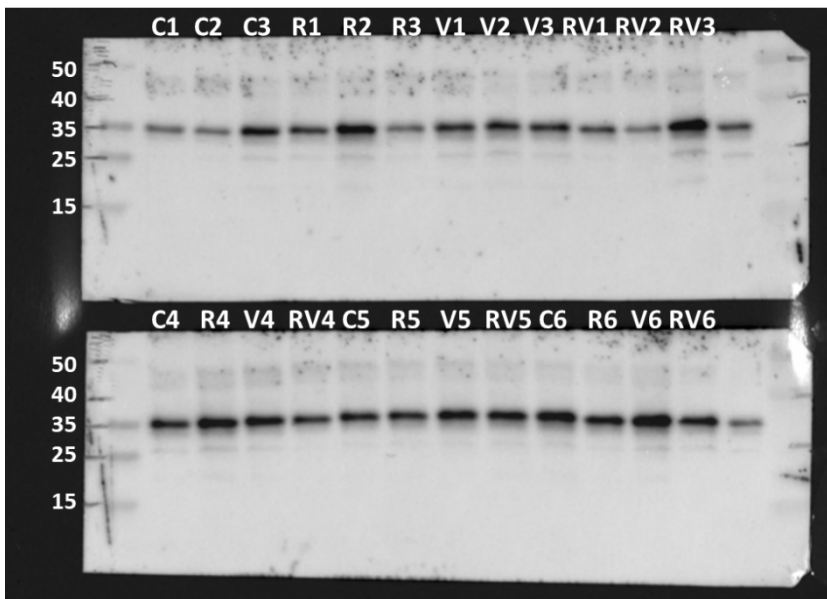



### p-S6 Telencephalon (32 kDa)

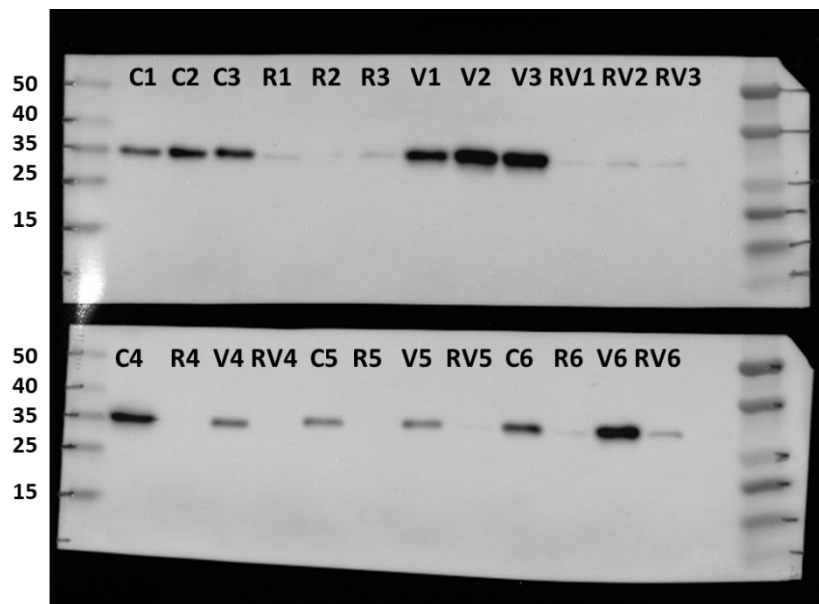

### S6 Telencephalon (32 kDa)

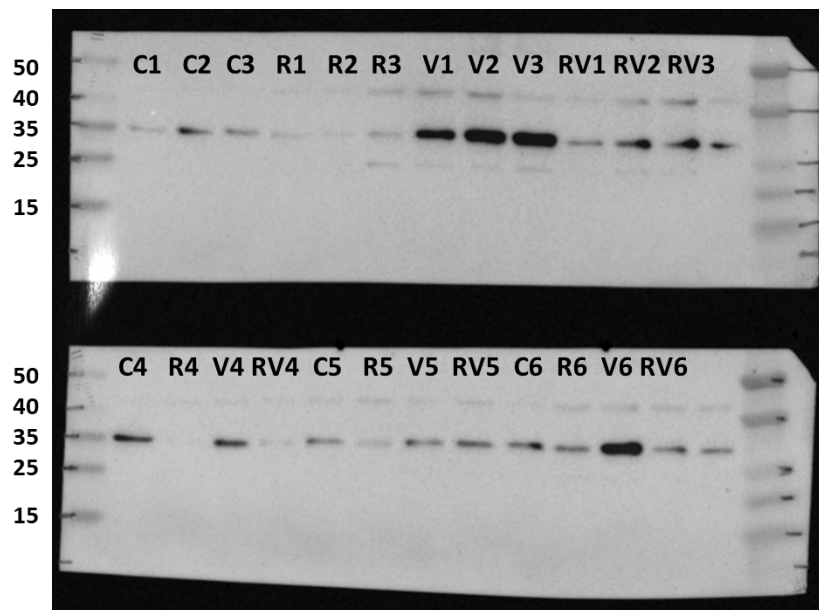

### p-S6K1 Hypothalamus (70 kDa)

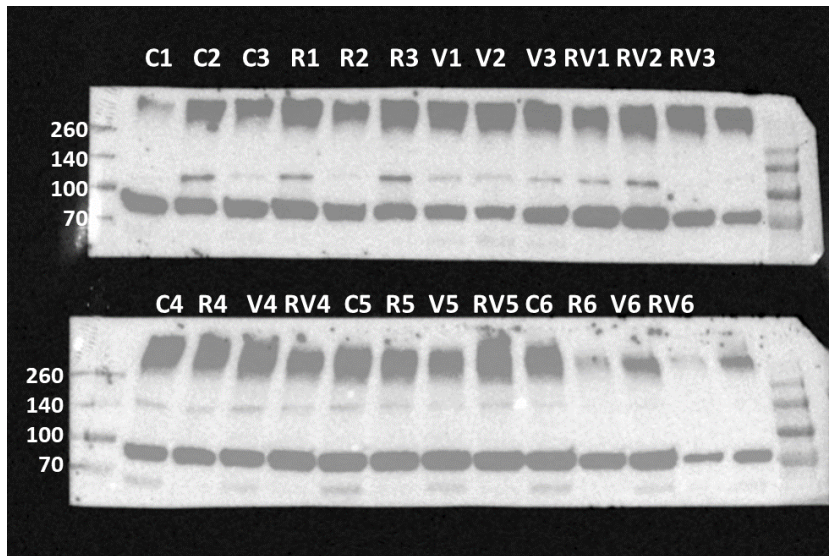

### S6K1 Hypothalamus (70 kDa)

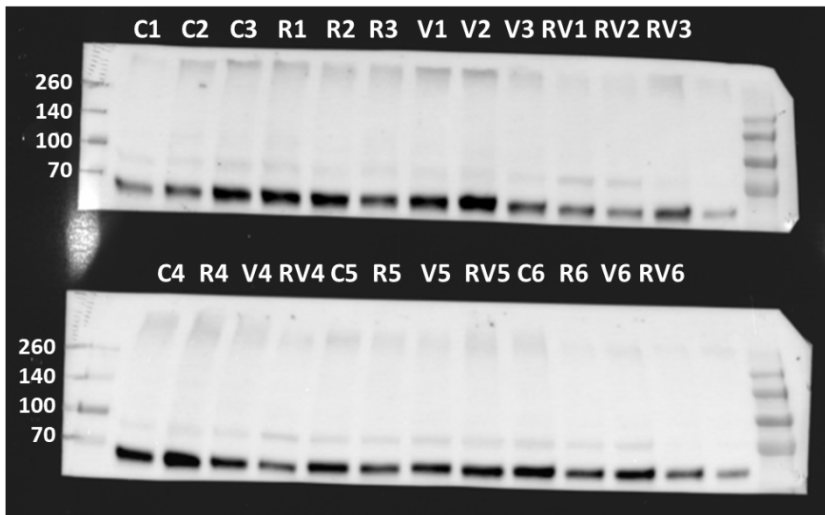

### p-S6K1 Telencephalon (70 kDa)

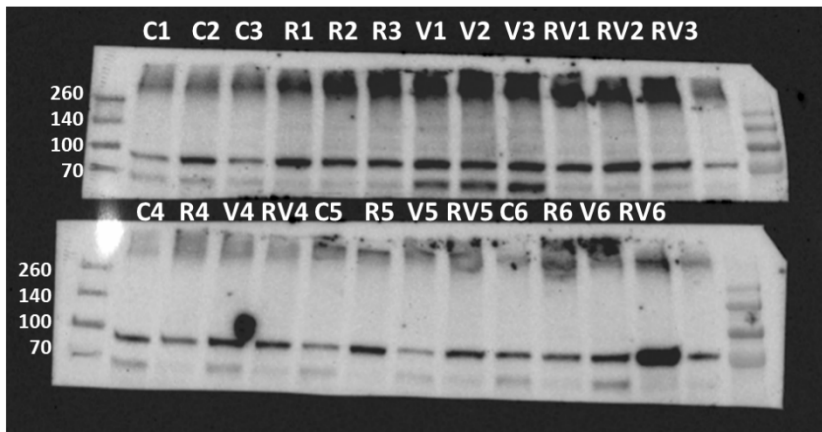

### S6K1 Telencephalon (70 kDa)

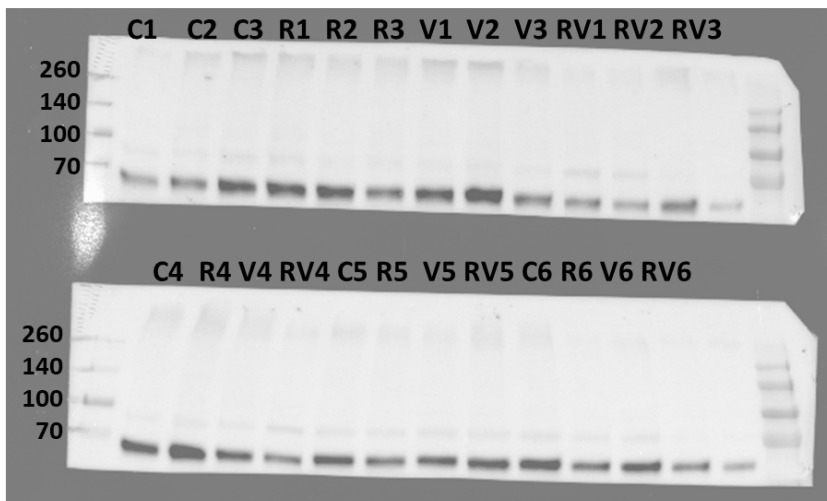

Supplement: f1 [file 7509382.f1.pdf]
